# Supplementary material
Source: publisher site journal article supplement (https://www.kjim.org/upload/media/kjim-2025-350-Supplementary-Table-2.pdf)
Supplement: Supplementary file 1 [file kjim-2025-350-Supplementary-Table-2.pdf]

**Supplementary Table 2. Association between lipid profiles and rectal cancer**

| Group                            | Number | Events | Follow-up duration (person-years) | Incidence rate (per 1,000 person-years) | Crude HR (95% CI, <i>p</i> value)  | Adjusted HR <sup>a)</sup> (95% CI, <i>p</i> value) |
|----------------------------------|--------|--------|-----------------------------------|-----------------------------------------|------------------------------------|----------------------------------------------------|
| <b>Remnant cholesterol group</b> |        |        |                                   |                                         |                                    |                                                    |
| 1st quartile                     | 46,476 | 168    | 313,402.0                         | 0.54                                    | 1 (reference)                      | 1 (reference)                                      |
| 2nd quartile                     | 48,695 | 200    | 327,320.4                         | 0.61                                    | 1.14 (0.93–1.40, <i>p</i> = 0.213) | 1.10 (0.89–1.35, <i>p</i> = 0.375)                 |
| 3rd quartile                     | 50,723 | 225    | 340,959.3                         | 0.66                                    | 1.23 (1.01–1.50, <i>p</i> = 0.042) | 1.16 (0.94–1.42, <i>p</i> = 0.159)                 |
| 4th quartile                     | 50,300 | 237    | 338,220.8                         | 0.70                                    | 1.31 (1.07–1.59, <i>p</i> = 0.008) | 1.22 (1.00–1.50, <i>p</i> = 0.055)                 |
| <b>LDL cholesterol group</b>     |        |        |                                   |                                         |                                    |                                                    |
| 1st quartile                     | 48,260 | 225    | 322,888.5                         | 0.70                                    | 1 (reference)                      | 1 (reference)                                      |
| 2nd quartile                     | 49,520 | 215    | 333,243.4                         | 0.65                                    | 0.93 (0.77–1.12, <i>p</i> = 0.424) | 1.00 (0.83–1.21, <i>p</i> = 0.974)                 |
| 3rd quartile                     | 49,603 | 207    | 334,353.6                         | 0.62                                    | 0.89 (0.74–1.07, <i>p</i> = 0.224) | 1.02 (0.85–1.24, <i>p</i> = 0.816)                 |
| 4th quartile                     | 48,811 | 183    | 329,417.0                         | 0.56                                    | 0.80 (0.66–0.97, <i>p</i> = 0.024) | 0.99 (0.81–1.21, <i>p</i> = 0.954)                 |
| <b>HDL cholesterol group</b>     |        |        |                                   |                                         |                                    |                                                    |
| 1st quartile                     | 49,343 | 238    | 330,438.2                         | 0.72                                    | 1 (reference)                      | 1 (reference)                                      |
| 2nd quartile                     | 50,297 | 225    | 338,485.3                         | 0.66                                    | 0.92 (0.77–1.11, <i>p</i> = 0.392) | 1.00 (0.83–1.20, <i>p</i> = 0.989)                 |
| 3rd quartile                     | 47,709 | 195    | 321,870.3                         | 0.61                                    | 0.84 (0.70–1.02, <i>p</i> = 0.075) | 0.96 (0.79–1.16, <i>p</i> = 0.663)                 |
| 4th quartile                     | 48,845 | 172    | 329,108.7                         | 0.52                                    | 0.73 (0.60–0.88, <i>p</i> = 0.001) | 0.89 (0.72–1.09, <i>p</i> = 0.243)                 |
| <b>Total cholesterol group</b>   |        |        |                                   |                                         |                                    |                                                    |
| 1st quartile                     | 48,929 | 238    | 327,190.2                         | 0.73                                    | 1 (reference)                      | 1 (reference)                                      |
| 2nd quartile                     | 48,107 | 201    | 323,782.0                         | 0.62                                    | 0.85 (0.71–1.03, <i>p</i> = 0.100) | 0.95 (0.79–1.15, <i>p</i> = 0.594)                 |
| 3rd quartile                     | 49,811 | 199    | 335,861.2                         | 0.59                                    | 0.82 (0.68–0.98, <i>p</i> = 0.034) | 0.97 (0.80–1.17, <i>p</i> = 0.737)                 |
| 4th quartile                     | 49,347 | 192    | 333,069.0                         | 0.58                                    | 0.79 (0.66–0.96, <i>p</i> = 0.017) | 1.03 (0.84–1.25, <i>p</i> = 0.788)                 |
| <b>Triglyceride group</b>        |        |        |                                   |                                         |                                    |                                                    |
| 1st quartile                     | 49,804 | 183    | 335,904.0                         | 0.54                                    | 1 (reference)                      | 1 (reference)                                      |
| 2nd quartile                     | 48,578 | 196    | 326,629.3                         | 0.60                                    | 1.10 (0.90–1.35, <i>p</i> = 0.350) | 1.06 (0.87–1.30, <i>p</i> = 0.570)                 |
| 3rd quartile                     | 48,992 | 216    | 329,170.8                         | 0.66                                    | 1.20 (0.99–1.47, <i>p</i> = 0.065) | 1.14 (0.93–1.39, <i>p</i> = 0.207)                 |
| 4th quartile                     | 48,820 | 235    | 328,198.4                         | 0.72                                    | 1.31 (1.08–1.59, <i>p</i> = 0.006) | 1.24 (1.01–1.51, <i>p</i> = 0.040)                 |

HR, hazard ratio; CI, confidence interval; LDL, low-density lipoprotein; HDL, high-density lipoprotein.

<sup>a)</sup>The model was adjusted for age, sex, income level, residential area, hypertension, diabetes mellitus, Charlson Comorbidity Index, body mass index, hemoglobin, glomerular filtration rate, smoking status, alcohol consumption, and regular exercise status.
